# Supplementary material
Source: Research Square preprint supplement (doi:10.21203/rs.3.rs-8942237/v1)
Supplement: Supplementary file 1 [file 17e0fa797780ba88f8feb2c5.docx]

**Table 1.** Patient and tumor characteristics

| **Factors** | **Values** |
| --- | --- |
| Age, median, years (range) | 83 (54–94) |
| Sex  Male  Female | 26  7 |
| ECOG PS  0  1  2 | 24  8  1 |
| Clinical stage  ΙB  ΙΙ  ΙΙΙA  ΙΙΙB  ⅣA | 16  4  6  6  1 |
| Vascular invasion  Vp1  Vp2  Vp3  Vv1  Vv3  B1  B2 | 2  2  4  2  2  1  1 |
| Operability  Resectable  Unresectable | 3  30 |
| Number of lesions irradiated simultaneously  1  2  3 | 28  2  3 |
| Etiology (overlap present)  Alcohol  HCV  NASH  HBV  Others | 8  5  3  2  18 |
| Median tumor diameter, cm (range) | 11 (10–18) |
| Median follow-up, mo (range) | 15.1 (2.8–54.0) |
| Child–Pugh score  Class A (5 points)  Class A (6 points)  Class B (7 points)  Class B (8 points)  Class B (9 points) | 22  5  4  1  1 |
| ALBI grade  1  2a  2b | 15  8  10 |
| Relative biological effectiveness-weighted dose  60 Gy in 4 fractions  67.2 Gy in 12 fractions  60 Gy in 12 fractions | 19  8  6 |
| Pretreatment AFP  　Median, ng/mL (range) | 45.2 (1.9–920000) |
| Pretreatment PIVKA ΙΙ  Median, mAU/mL (range) | 12353 (26–123760) |

Abbreviations: ECOG PS, Eastern Cooperative Oncology Group performance status; Vp, portal vein invasion; HCV, hepatitis C virus; NASH, nonalcoholic steatohepatitis; HBV, hepatitis B virus; ALBI, albumin–bilirubin; AFP, alpha-fetoprotein; PIVKA-ΙΙ, protein induced by vitamin K absence or antagonist ΙΙ
