# Supplementary material
Source: Research Square preprint supplement (doi:10.21203/rs.3.rs-8942237/v1)
Supplement: Supplementary file 2 [file 7c6e5612c69d63690d94b965.docx]

**Table 2.** Treatment-related toxicities according to the Common Terminology Criteria for Adverse Events v5.0

| **Grade** | **2** | **3** | **4** | **5** | **Total (%)** |
| --- | --- | --- | --- | --- | --- |
| Ascites | 3 | 0 | 0 | 0 | 3 (9%) |
| Pleural effusion | 1 | 2 | 0 | 0 | 3 (9%) |
| Rib fracture | 2 | 0 | 0 | 0 | 2 (6%) |
| Dermatitis radiation | 1 | 0 | 0 | 0 | 1 (3%) |
| Hepatic failure | 0 | 1 | 0 | 0 | 1 (3%) |
| Bile duct stenosis | 0 | 1 | 0 | 0 | 1 (3%) |
| Bile tract infection | 0 | 1 | 0 | 0 | 1 (3%) |
| Heart failure | 0 | 1 | 0 | 0 | 1 (3%) |
